# Supplementary material
Source: Springer Nature journal article supplement (https://www.springermedizin.de/resource/supplementary/12933_2002_3_MOESM3_ESM.pdf/9538100)
Supplement: MOESM3 [file 9538100]

# HYPERGLYCEMIA HYPERTENSION IGT, IFG and T2DM

Innate Immunity  
IL-6  
TNF-alpha

MICROALBUMINURIA  
HYPERURICEMIA

Hirsutism  
Hyperandrogenemia  
Decreased FSH  
^ LH  
PCOS

## PAI-1

## IR

## Fibrinogen

Acute Phase Respose  
Fibrinogen  
Hs-CRP

Visceral Obesity

ENDOTHELIAL DYSFUNCTION:

MICROALBUMINURIA.

Selectins CAMs

eNOS-Uncoupling. Increased O<sub>2</sub>' Superoxide.

Impaired Endothelium-dependent Vasodilation.

ADMA

## HYPERLIPIDEMIA

^TRIGS, ↓HDL ^small dense  
LDL

## Hyperinsulinemia

## \*AMYLIN
